# Supplementary material
Source: publisher figshare collection journal article supplement (https://gsapubs.figshare.com/ndownloader/files/22411164)
Supplement: Supplementary file 1 [file 22411164]

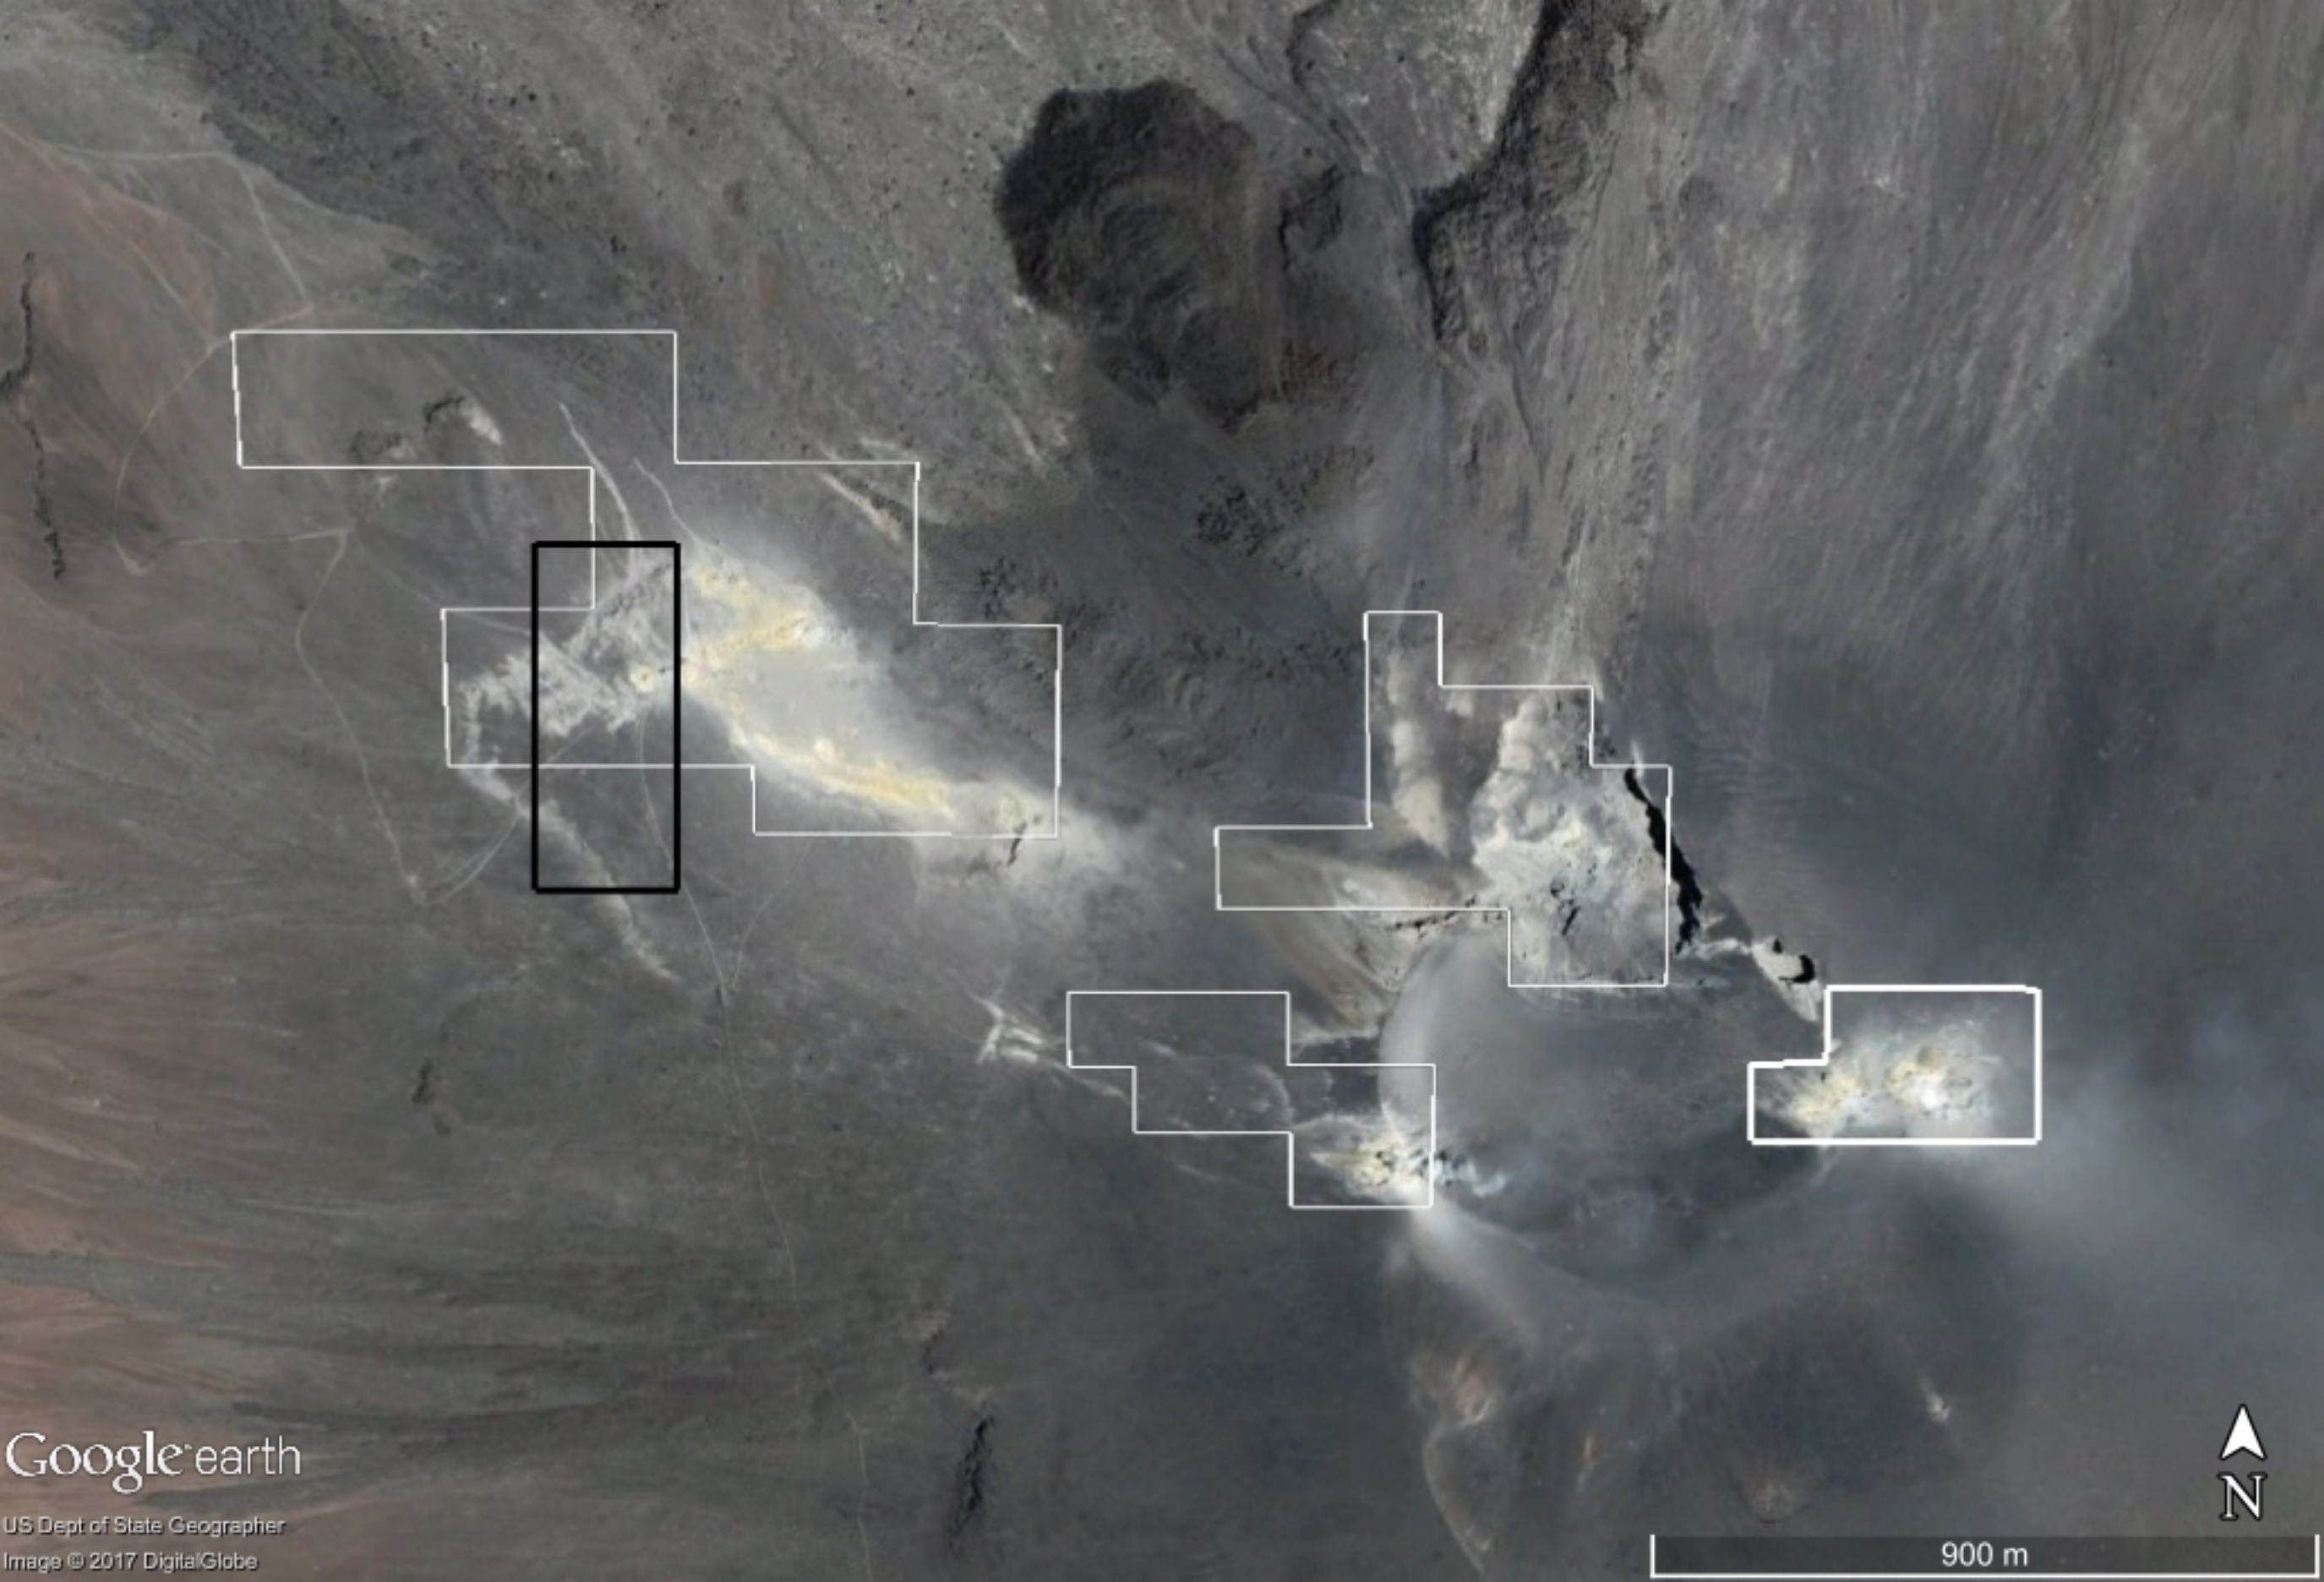

Google earth

US Dept of State Geographer  
Image © 2017 DigitalGlobe

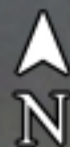

900 m

Supplemental Figure. Omnidirectional variograms for soil CO<sub>2</sub> fluxes (A) and soil temperature (B) data.

Figure S2 caption

Google Earth (Digital Globe [<http://www.earth.google.com>], accessed 5 June 2017) image of Lastarria's edifice showing regions of hydrothermal mineralization (white to yellow coloring) associated with the main degassing sites. The white polygons shown the regions used to extrapolate diffuse carbon fluxes based on this image and the elevated surface temperatures seen in Figure 12. The black rectangle shows the diffuse degassing survey region shown in Figure 4. See text for details.
